# Supplementary material for: Improved Less Invasive Surfactant Administration Success in Preterm Infants after Procedure Standardization
Source: MDPI journal article supplement (doi:10.3390/children8121145), 2021-12-06

Bjoern Liebers, Chinedu Ulrich Ebenebe, Monika Wolf, Martin Ernst Blohm, Elk Vettorazzi, Dominique Singer, and Philipp Deindl

## Less-invasive surfactant administration (LISA): A quality improvement initiative

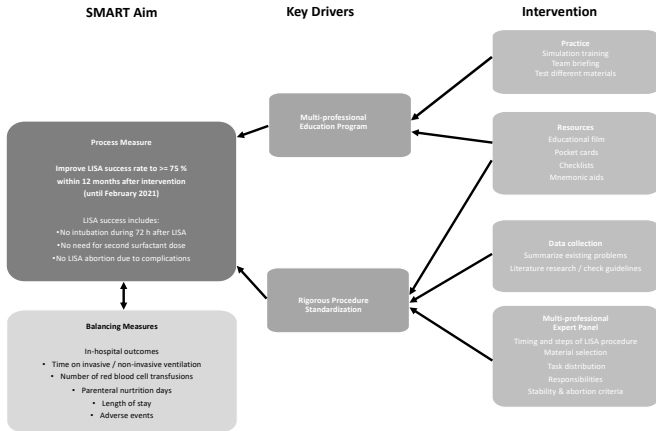

Supplement: s1 [file s1]
